# Supplementary material for: A pH/redox-dual responsive, nanoemulsion-embedded hydrogel for efficient oral delivery and controlled intestinal release of magnesium ions
Source: Royal Society of Chemistry journal article supplement (doi:10.1039/d0tb02442b), 2021-01-01
Supplement: d0tb02442b1.pdf [file d0tb02442b1.pdf]

## Supporting Information

### **A pH/Redox-Dual Responsive, Nanoemulsion-Embedded Hydrogel for Efficient Oral Delivery and Controlled Intestinal Release of Magnesium Ions**

Yu Huang<sup>a,†</sup>, Zewei Wang<sup>a,†</sup>, Guiju Zhang<sup>a,b</sup>, Jie Ren<sup>a</sup>, Li Yu<sup>a</sup>, Xuhan Liu<sup>a</sup>, Yuanxi Yang<sup>a</sup>, Abirami Ravindran,<sup>a</sup> Chloe Wong,<sup>a</sup> and Rongjun Chen<sup>a,\*</sup>

<sup>a</sup> Department of Chemical Engineering, Imperial College London, South Kensington Campus, London SW7 2AZ, United Kingdom

<sup>b</sup> School of Light Industry, Beijing Technology and Business University, 11 Fucheng Road, Haidian District, Beijing 100048, P. R. China

\* Corresponding author: Dr Rongjun Chen.

Tel: +44 (0)20 75942070

Fax: +44 (0)20 75945638

E-mail: rongjun.chen@imperial.ac.uk

† These authors contributed equally to this work.

**Table S1.** The formulae of hydrogels with different polymer concentrations.

| Hydrogel | PLP<br>(mg) | CDE<br>(mg) | EDC<br>(mg) | NHS<br>(mg) | PLP concentration<br>(wt%) |
|----------|-------------|-------------|-------------|-------------|----------------------------|
| Gel1     | 50          | 13          | 70          | 10          | 5                          |
| Gel2     | 75          | 19          | 104         | 17          | 7                          |
| Gel3     | 100         | 26          | 140         | 20          | 9                          |
| Gel4     | 150         | 38          | 208         | 34          | 13                         |
| Gel5     | 200         | 50          | 278         | 42          | 17                         |

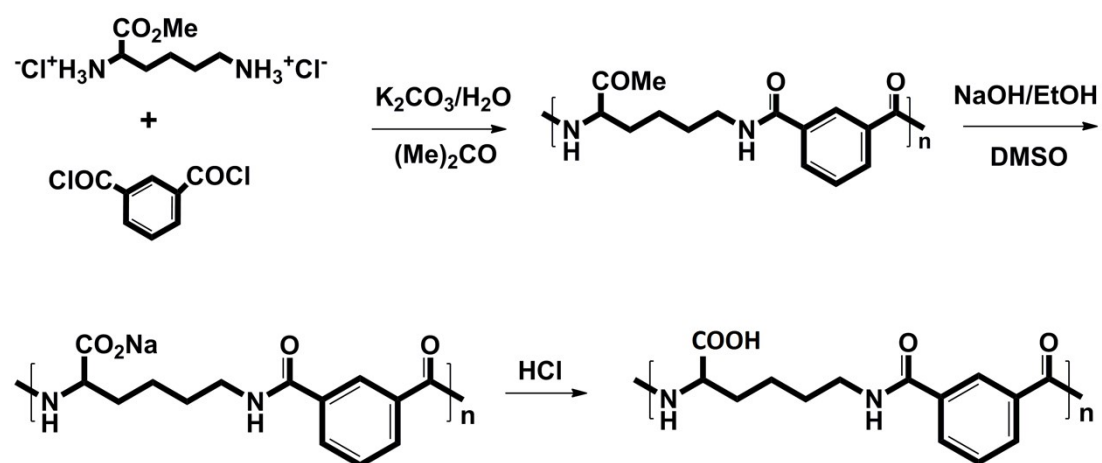

**Figure S1.** The synthesis route of poly(L-lysine isophthalamide) (PLP).

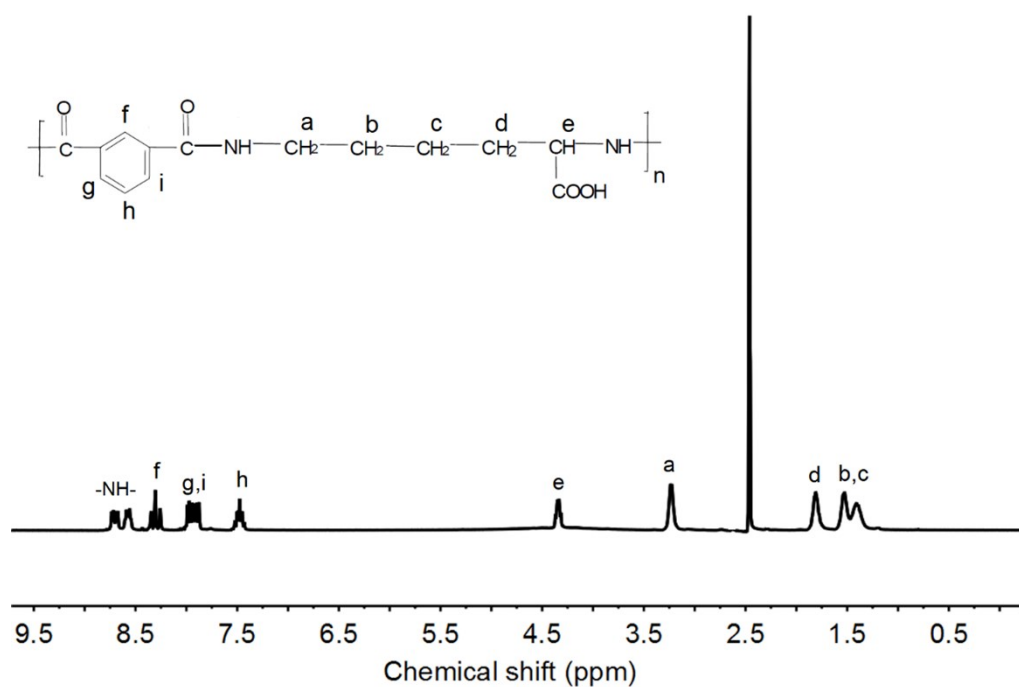

**Figure S2.**  $^1\text{H-NMR}$  spectrum of PLP (400 MHz, in  $\text{DMSO-}d_6$ , 298 K). The  $^1\text{H-NMR}$  spectrum of its acid form in  $\text{DMSO-}d_6$  consisted of various peaks as follows:  $\delta$  (ppm) 1.28-1.64 (b:  $-\text{CH}_2-$  and c:  $-\text{CH}_2-$ ), 1.76-1.97 (d:  $-\text{CH}_2-$ ), 3.12-3.34 (a:  $-\text{CH}_2-$ ), 4.25-4.43 (e:  $-\text{CH}-$ ), 7.37-7.65 (h: complex multiplet aromatic  $-\text{C}-\text{H}$ ); 7.85-8.17 (g and i: complex multiplet aromatic  $-\text{C}-\text{H}$ ), 8.23-8.45 (f: complex multiplet aromatic  $-\text{C}-\text{H}$ ), 8.53-8.96 (complex series of peaks amide  $-\text{NH}-$ ).

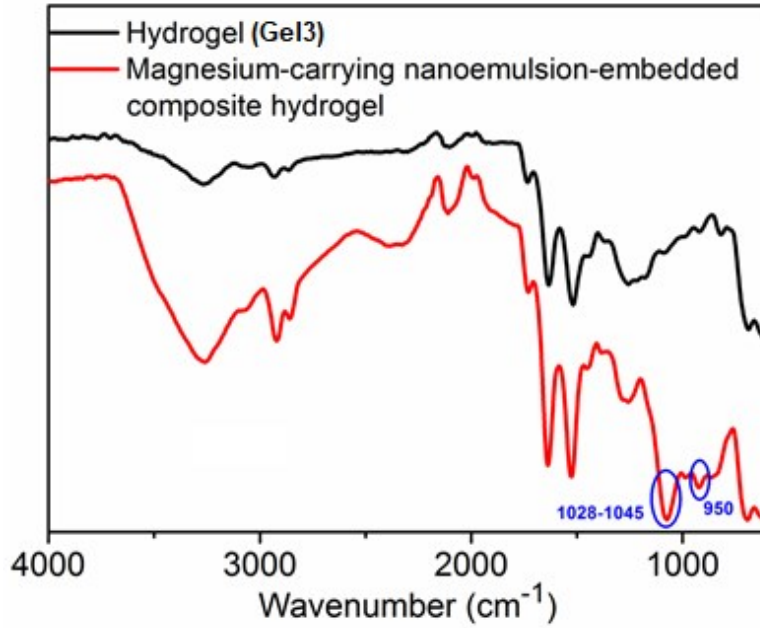

**Figure S3.** Typical FTIR spectra of the hydrogel Gel3 and the magnesium-carrying nanoemulsion-embedded hydrogel Gel3 ( $294.7 \pm 4.8$  mg of loaded magnesium).

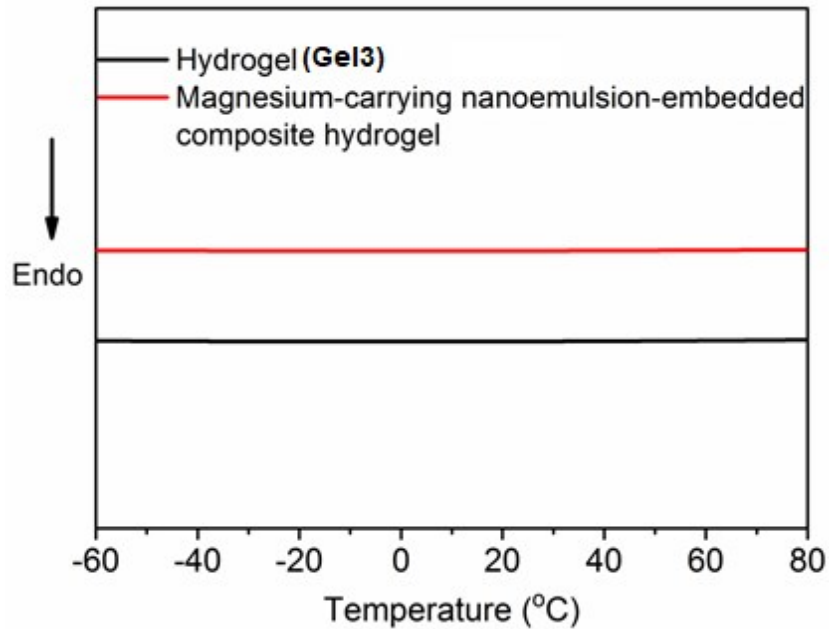

**Figure S4.** Typical DSC spectra of the lyophilized Gel3 and the lyophilized composite hydrogel Gel3 embedded with magnesium-carrying nanoemulsions ( $294.7 \pm 4.8$  mg of loaded magnesium).

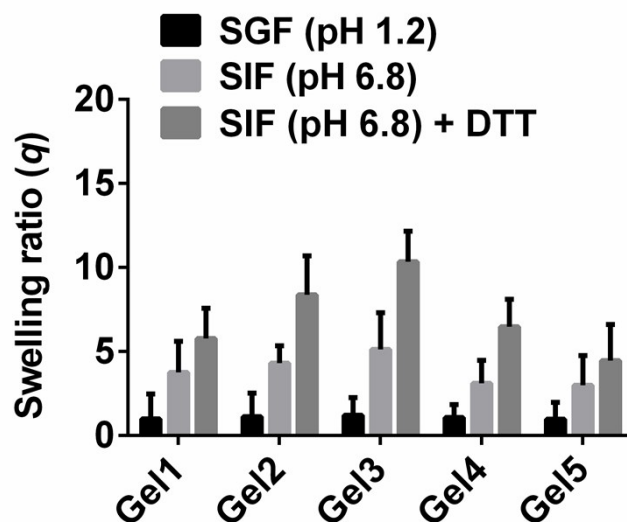

**Figure S5.** Swelling ratios  $q$  of different hydrogels with the PLP concentration at 5 wt% (Gel1), 7 wt% (Gel2), 9 wt% (Gel3), 13 wt% (Gel4) and 17 wt% (Gel5) after treatment with SGF (pH 1.2), SIF (pH 6.8) and SIF (pH 6.8) + 125 mM of DTT for 1 h, respectively.

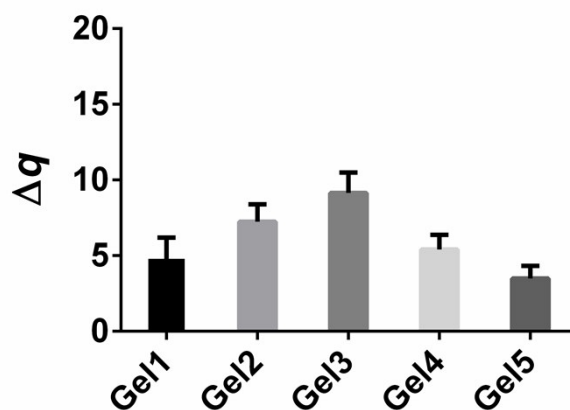

**Figure S6.** The differences in swelling ratio ( $\Delta q$ ) of different hydrogels between treatments in SGF (pH 1.2) and SIF (pH 6.8) + 125 mM of DTT for 1 h.

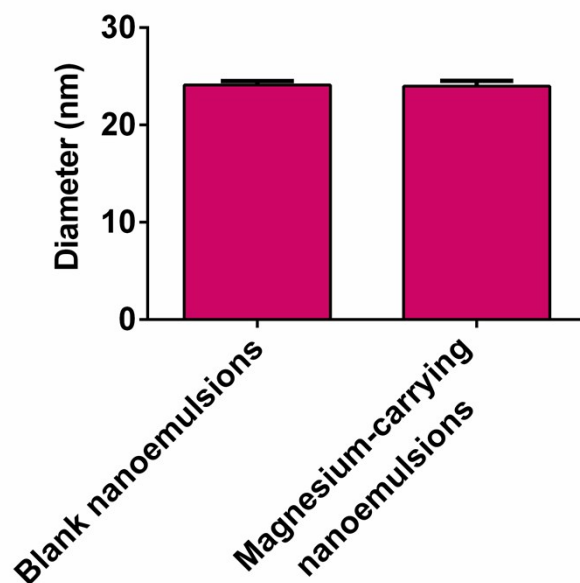

**Figure S7.** DLS size of blank nanoemulsions and magnesium-carrying nanoemulsions ( $294.7 \pm 4.8$  mg of loaded magnesium) in pH 7.4 PBS buffer.

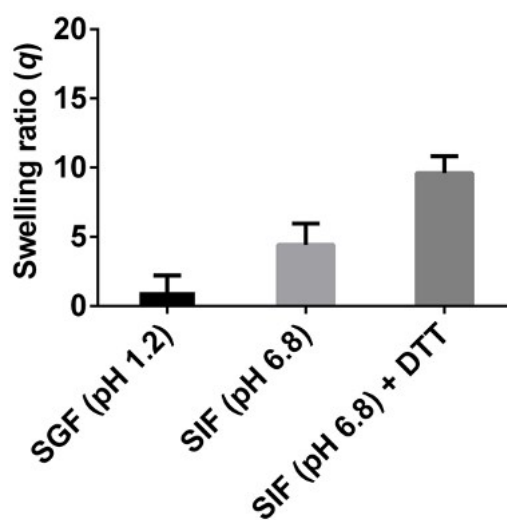

**Figure S8.** Swelling ratios  $q$  of the magnesium-loaded composite hydrogels after treatment of SGF (pH 1.2), SIF (pH 6.8) and SIF (pH 6.8) + 125 mM of DTT buffer for 1 h, respectively.

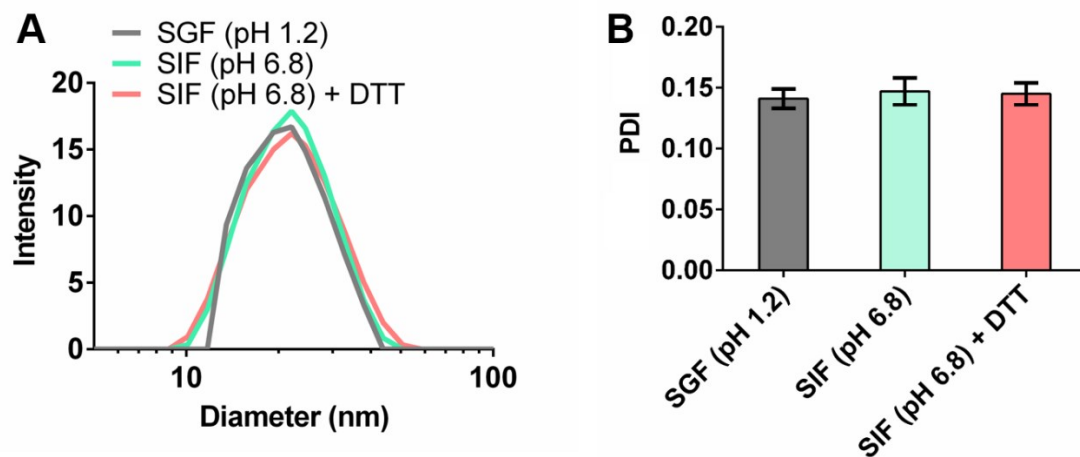

**Figure S9.** (A) Typical DLS size distribution and (B) PDI of the magnesium-carrying nanoemulsions post release from the composite hydrogels treated in SGF (pH 1.2), SIF (pH 6.8) and SIF (pH 6.8) + 125 mM of DTT, respectively for 6 h.
